# Supplementary material
Source: publisher figshare collection journal article supplement (https://gsajournals.figshare.com/ndownloader/files/27242495)
Supplement: Supplementary file 1 [file 27242495]

## Sheet: TableS3_F2varianceExplained
Table S3. Percentage of F2 variance explained for each Procrustes coordinate by 29 QTL.
Landmark	Coordinate	Percentage of Variance Explained
1	1	26.8327
1	2	35.9685
2	3	14.4606
2	4	16.6261
3	5	36.2889
3	6	22.4221
4	7	33.7412
4	8	26.7687
5	9	25.5191
5	10	32.2717
6	11	22.8112
6	12	29.3274
7	13	21.3845
7	14	27.9802
8	15	29.1088
8	16	24.8368
9	17	27.7214
9	18	17.6414
10	19	35.1579
10	20	30.0852
11	21	22.5426
11	22	31.5205
12	23	23.1591
12	24	34.0701
13	25	23.454
13	26	31.2579
14	27	28.1423
14	28	25.1277
15	29	19.2712
15	30	21.2854
16	31	23.2729
16	32	17.2117
